# Supplementary material for: Controllable assembly of copper(i)-iodide coordination polymers by tecton design of benzotriazol-1-yl-based pyridyl ligands: from 2D layer to 3D self-penetrating or homochiral networks
Source: Royal Society of Chemistry journal article supplement (doi:10.1039/c002030n), 2010-01-01
Supplement: c002030n.pdf [file c002030n.pdf]

## ***Electronic Supplementary Information (ESI)***

**Controllable assembly of copper(I)-iodide coordination polymers by tecton design of benzotriazol-1-yl-based pyridyl ligands: from 2D layer to 3D self-penetrating or homochiral networks†**

**Shao-Ming Fang,<sup>a</sup> Qiang Zhang,<sup>a</sup> Min Hu,<sup>a</sup> Bo Xiao,<sup>a</sup> Li-Ming Zhou,<sup>a</sup> Guang-Hui Sun,<sup>a</sup> Li-Jun Gao,<sup>a</sup> Miao Du<sup>\*,b</sup> and Chun-Sen Liu<sup>\*,a</sup>**

<sup>a</sup> Zhengzhou University of Light Industry, Henan Provincial Key Laboratory of Surface & Interface Science, Zhengzhou, Henan 450002, P. R. China. E-mail: [chunsenliu@zzuli.edu.cn](mailto:chunsenliu@zzuli.edu.cn) (C.S.L.); Fax: +86-371-63556792

<sup>b</sup> College of Chemistry and Life Science, Tianjin Key Laboratory of Structure and Performance for Functional Molecule, Tianjin Normal University, Tianjin 300387, P. R. China. E-mail: [dumiao@public.tpt.tj.cn](mailto:dumiao@public.tpt.tj.cn)

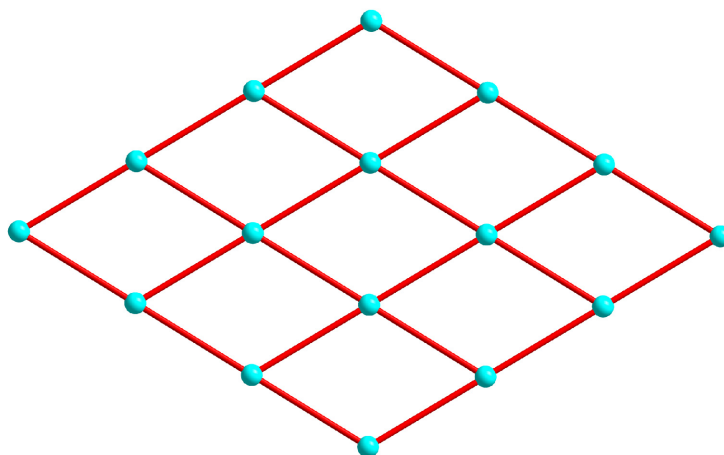

**Fig. S1** A schematic representation of the 2D (4,4) network in **1** (red rods: 2-pbtp ligands; cyan spheres: rhomboid  $[\text{Cu}_2\text{I}_2]$  dimeric units).

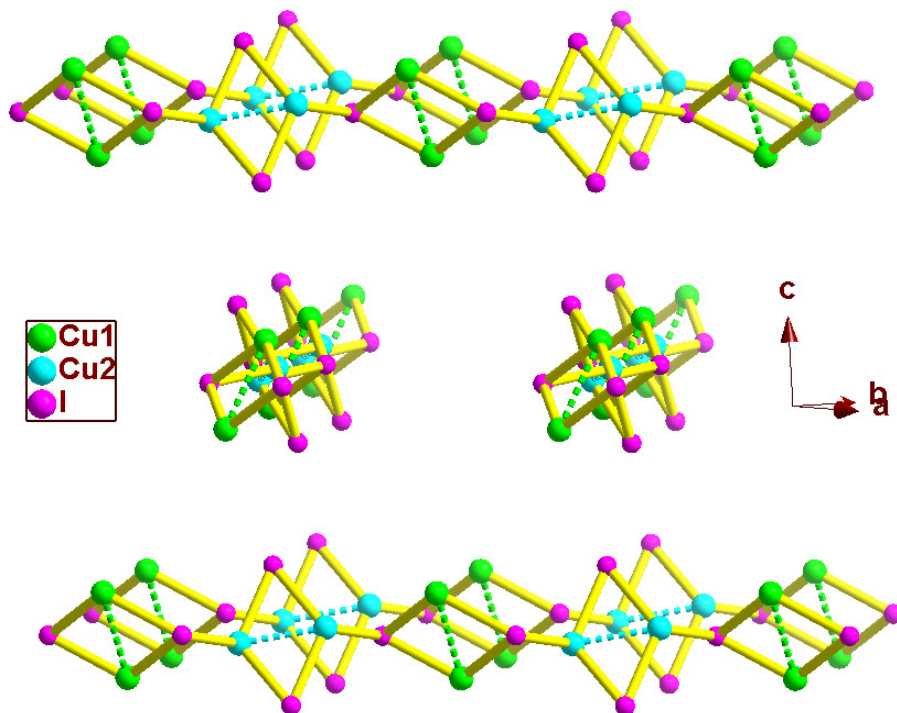

**Fig. S2** View of the perpendicularly arrangement of the (1D) [Cu<sub>2</sub>I<sub>2</sub>]<sub>n</sub> skeletons, extracted from the 3D framework in **2**, running along the [110] and  $[\bar{1}\bar{1}0]$  directions, respectively.

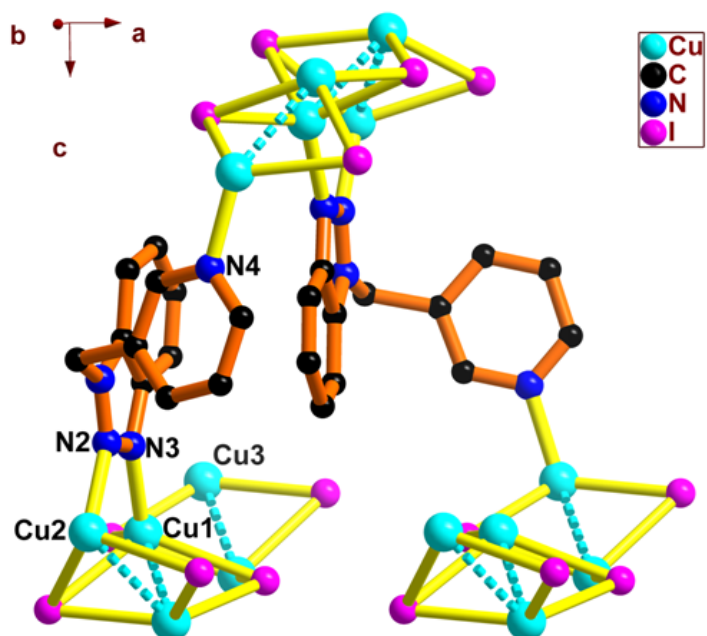

**Fig. S3** View of the coordination connectivity of 3-pbt between the adjacent  $[Cu_3I_3]_n$  skeletons in **3**, running along the crystallographic  $[010]$  direction.

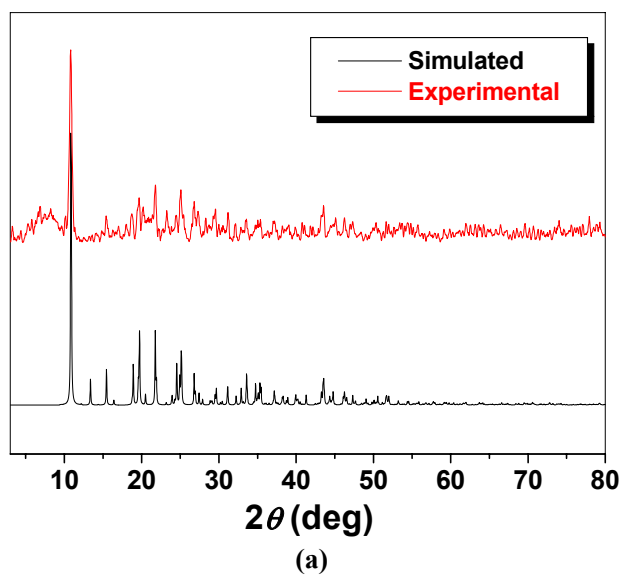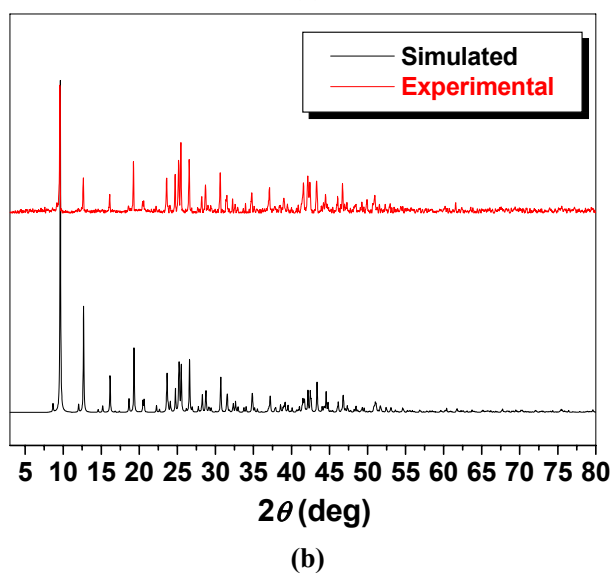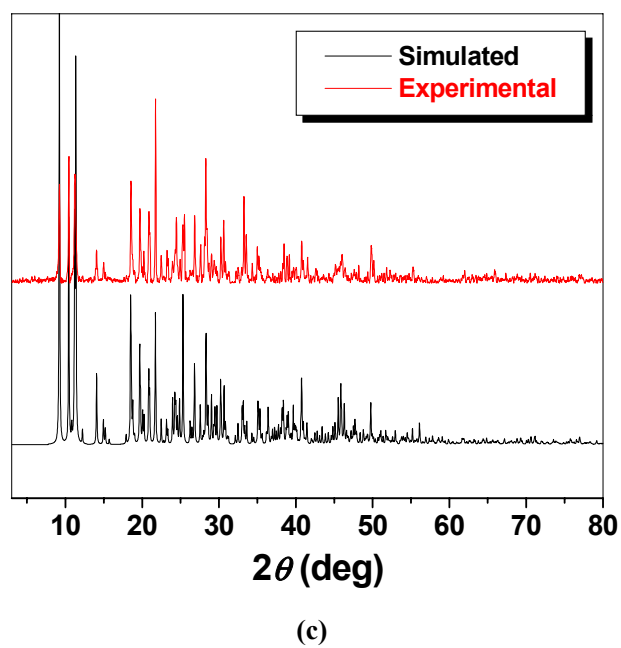

Fig. S4 XRPD patterns of (a) 1, (b) 2, and (c) 3.

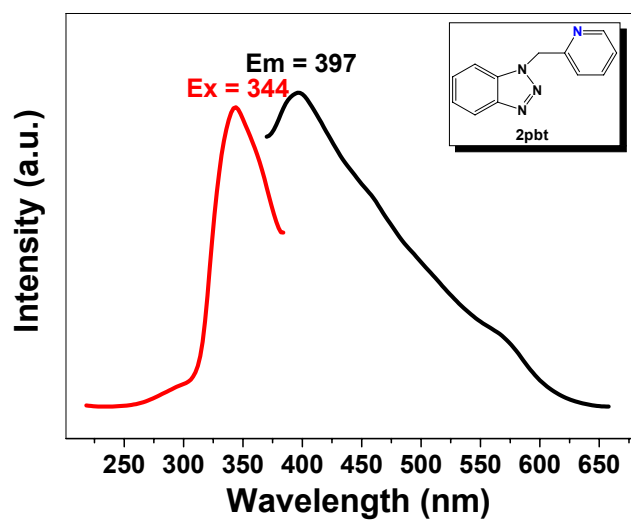

(a)

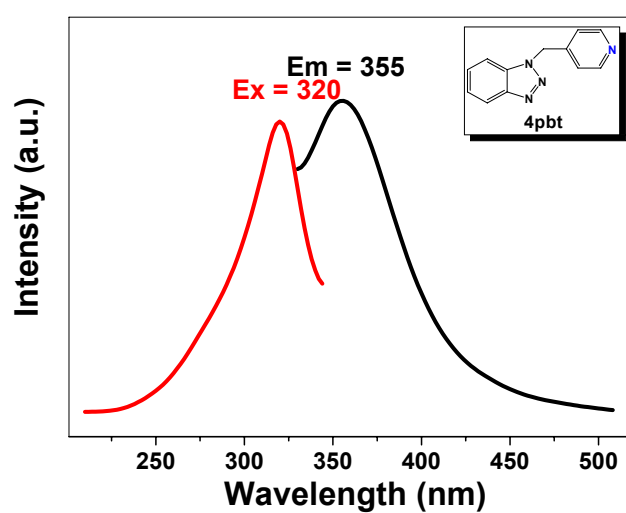

(b)

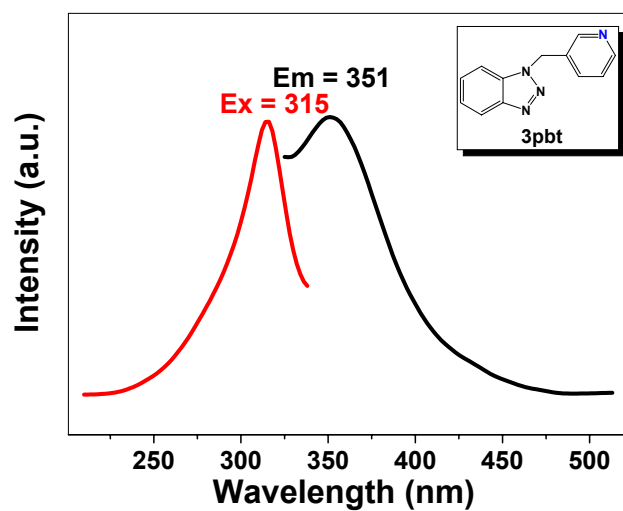

(c)

**Fig. S5** Excitation and emission spectra of the free ligands in the solid state at room temperature: (a) for 2-pbt, (b) for 4-pbt, and (c) for 3-pbt.

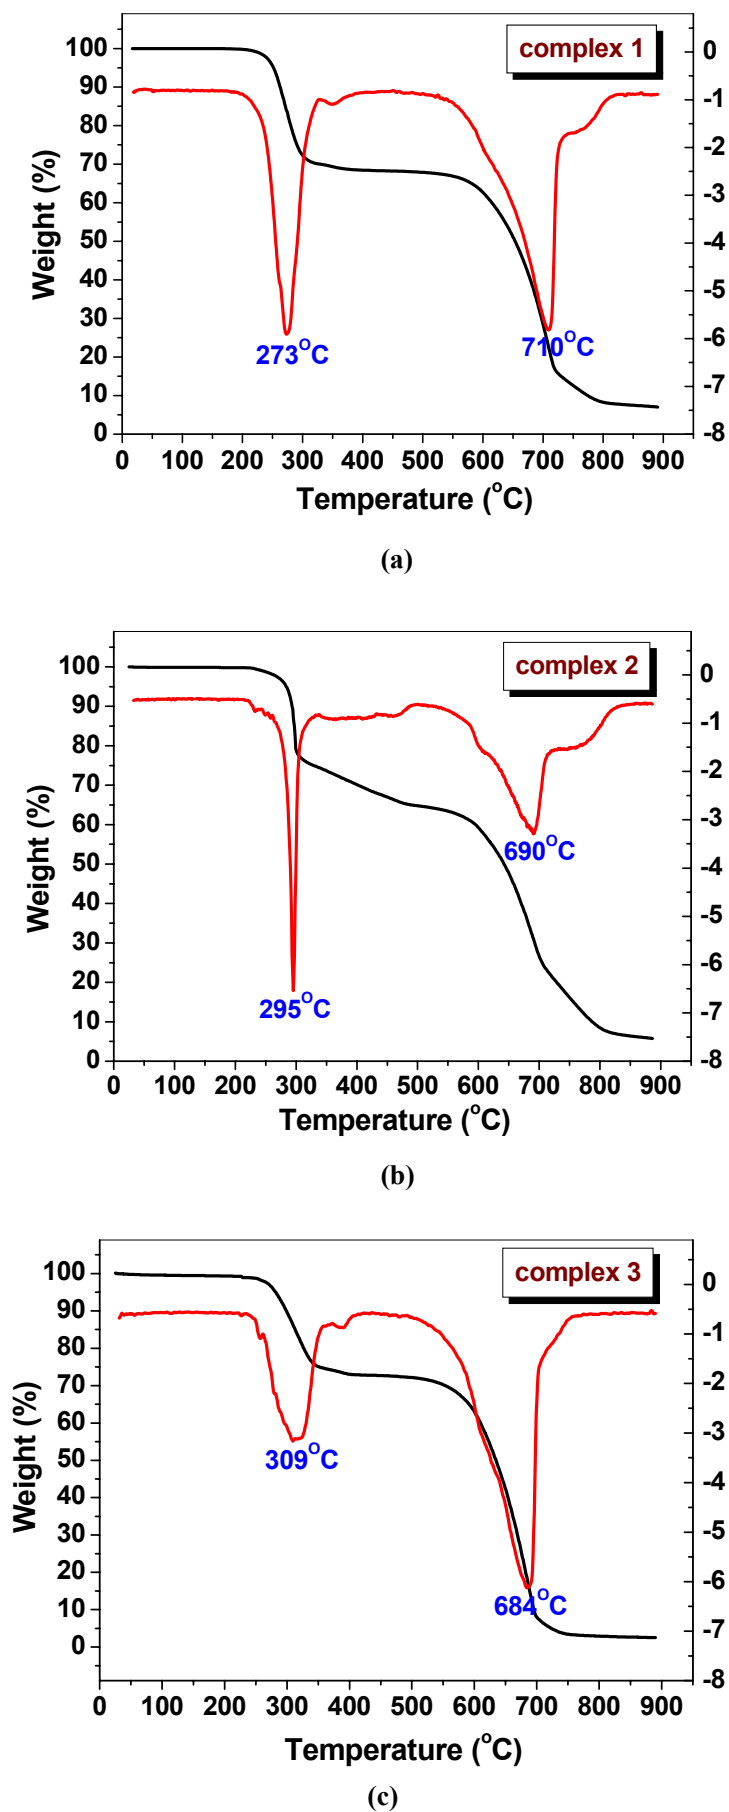

Fig. S6 Thermogravimetric (TG) analysis plots of (a) 1, (b) 2, and (c) 3.
